# Supplementary figures and images for: A microfluidic device for high throughput bacterial biofilm studies
Source: Royal Society of Chemistry journal article supplement (doi:10.1039/c2lc20800h), 2012-01-01

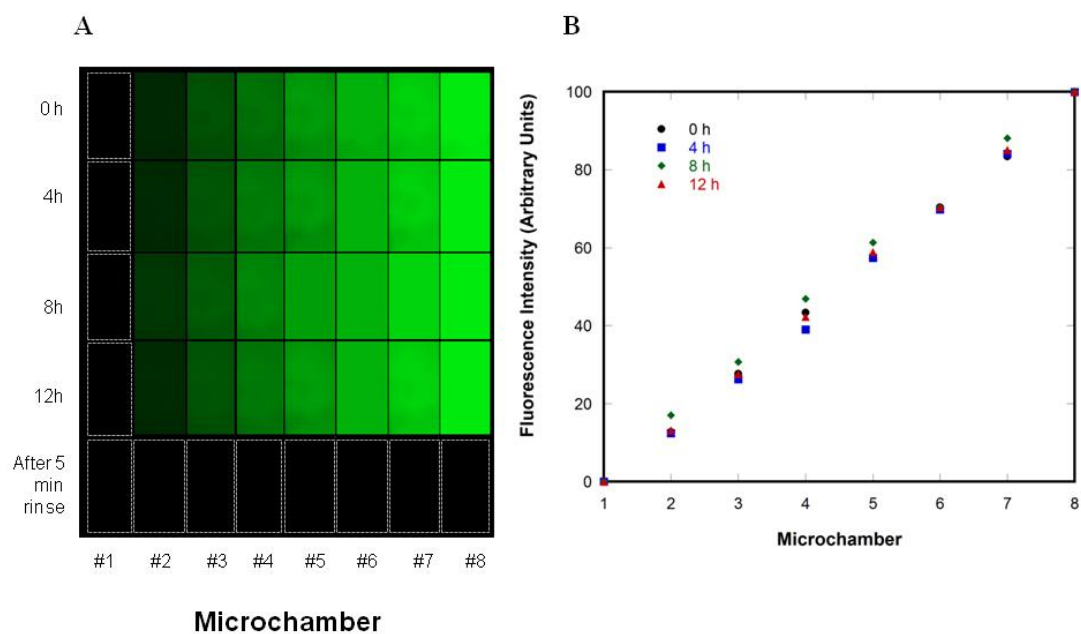

Supplemental Figure S1

Supplement: c2lc20800h.pdf [file c2lc20800h.pdf]
